# Supplementary material for: Artificial Intelligence and Pharmacometrics: Time to Embrace, Capitalize, and Advance?
Source: PubMed Central journal article supplement — CPT Pharmacometrics Syst Pharmacol. 2019 Jun 5;8(7):440–3. doi: 10.1002/psp4.12418 (PMC6657004; doi:10.1002/psp4.12418), 2019-06-05
Supplement: PSP4-8-440-s001.pdf [file PSP4-8-440-s001.pdf]

## Supplement

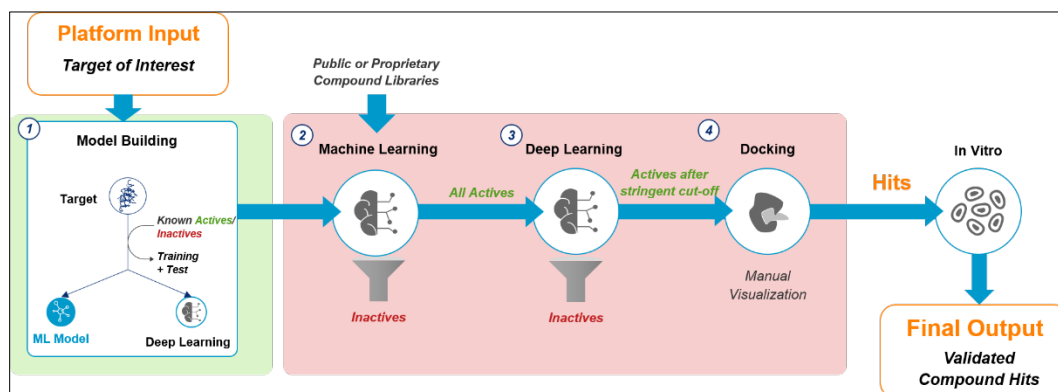

Figure S1. Excelra's Multi-layered AI Platform for Hit Identification

| Total n= 52 | Predicted: Yes | Predicted: No |
|-------------|----------------|---------------|
| Actual: Yes | 12             | 3             |
| Actual: No  | 8              | 29            |

Table S1. Confusion matrix for pipeline built for Bruton's Tyrosine Kinase

Additional reading on AI/DL/ML applications reported in pharmacometrics:

1. Yamashita F, Fujita A, Sasa Y, Higuchi Y, Tsuda M, Hashida M. An Evolutionary Search Algorithm for Covariate Models in Population Pharmacokinetic Analysis. *J Pharm Sci.* 2017 Sep;106(9):2407-2411.
2. Hall RG, Pasipanodya JG, Swancutt MA, Meek C, Leff R, Gumbo T. Supervised Machine-Learning Reveals That Old and Obese People Achieve Low Dapsone Concentrations. *CPT Pharmacometrics Syst Pharmacol.* 2017;6(8):552-559.
3. S Polak, A Mendyk, N Patel. Combining machine learning and mechanistic modeling approaches to solve real life problems – assessment of the local tissue binding and its influence on the systemic exposure after topical application of drugs. *J Pharmacokinet Pharmacodyn* (2018) 45:S3–S134.
